# Supplementary material for: Sub-diffraction-limit localization imaging of a plasmonic nanoparticle pair with wavelength-resolved dark-field microscopy
Source: Royal Society of Chemistry journal article supplement (doi:10.1039/c7nr02474f), 2017-01-01
Supplement: c7nr02474f1.pdf [file c7nr02474f1.pdf]

## Supporting Information

# Sub-diffraction-Limit Localization Imaging of Plasmonic Nanoparticle Pair with Wavelength-Resolved Dark-Field Microscopy

*Lin Wei,<sup>†</sup> Yanhong Ma,<sup>†</sup> Xupeng Zhu,<sup>‡</sup> Jianghong Xu,<sup>†</sup> Yaxin Wang,<sup>§</sup> Huigao Duan,<sup>‡</sup> and Lehui Xiao<sup>\*,†,§</sup>*

<sup>†</sup> Key Laboratory of Phytochemical R&D of Hunan Province, College of Chemistry and Chemical Engineering, Hunan Normal University, Changsha, Hunan, 410081, China

<sup>§</sup> College of Chemistry, Tianjin Key Laboratory of Biosensing and Molecular Recognition, Nankai University, Tianjin, 300071, China

<sup>‡</sup> School of Physics and Electronics, State Key Laboratory of Advanced Design and Manufacturing for Vehicle Body, Hunan University, Changsha, Hunan, 410082, China

\* Corresponding Author

Email: lehuixiao@163.com

Fax: +86-022-23500201

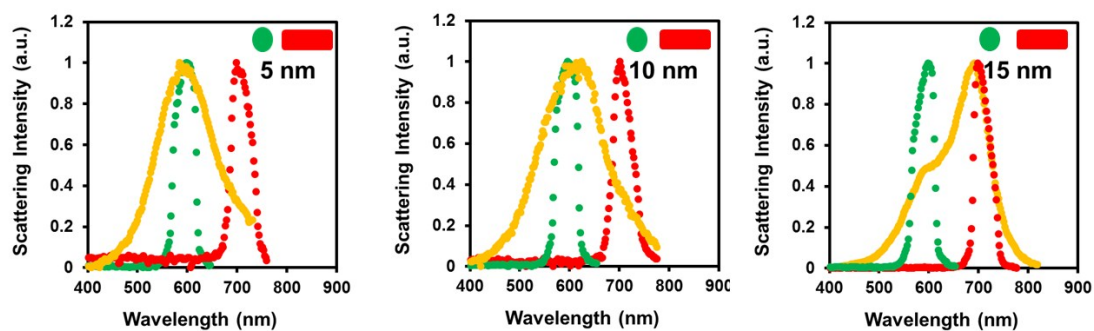

**Figure S1.** The measured scattering spectra (yellow dotted lines) of nanoparticle pairs in an end-to-end orientation with narrow gap distance (5, 10, and 15 nm, from left to right). The green and red dotted lines are the transmission spectra of the filters in the green and red channels respectively.
